# Supplementary material for: Atomic scale niobium implantation in a dealuminated industrial H-β zeolite catalyst for enhanced furfural production
Source: Royal Society of Chemistry journal article supplement (doi:10.1039/d4ta03915g), 2024-01-01
Supplement: d4ta03915g1.pdf [file d4ta03915g1.pdf]

## Supporting information

### Atomic scale niobium implantation in dealuminated industrial H- $\beta$ zeolite catalyst for enhanced furfural production

Yuhui Huang,<sup>a</sup> Yehan Tao,<sup>a,b\*</sup> Qingqing Wang,<sup>a</sup> Jian Du,<sup>a</sup> Jinwen Hu,<sup>a</sup> Jie Lu,<sup>a</sup> Yanna Lv,<sup>a</sup> and Haisong Wang<sup>a\*</sup>

<sup>a</sup> Liaoning Key Lab of Lignocellulose Chemistry and BioMaterials, Liaoning Collaborative Innovation Center for Lignocellulosic Biorefinery, Department of Light Industry and Chemical Engineering, Dalian Polytechnic University, Dalian, 116034, China

<sup>b</sup> Shandong Sun Paper Industry Joint Stock, Jining, 272100, China

#### \*Corresponding authors:

Yehan Tao, E-mail address: taoyh1818@dlpu.edu.cn

Haisong Wang, E-mail address: wanghs@dlpu.edu.cn

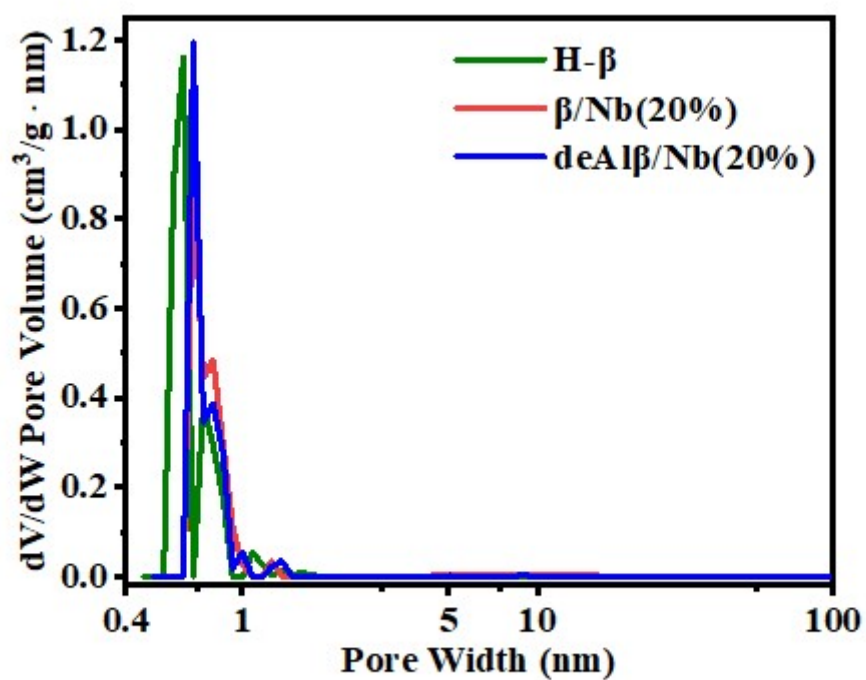

Fig. S1 Pore size distribution of different materials.

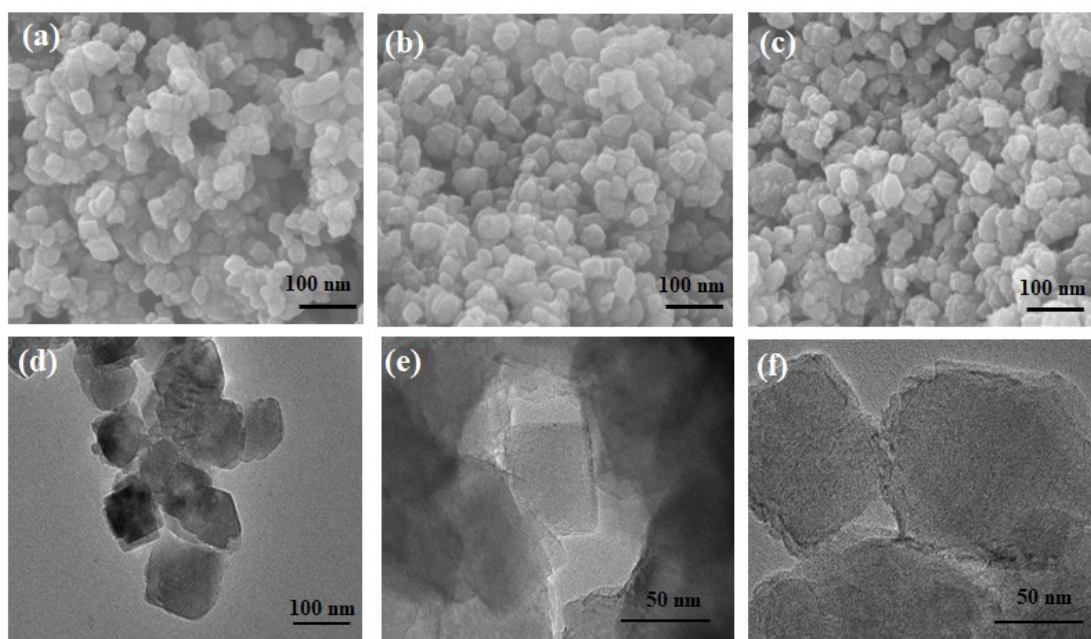

Fig. S2 (a-c) SEM and (d-f) TEM images of H- $\beta$  zeolite,  $\beta$ /Nb(20%) and deAl $\beta$ /Nb(20%) catalysts.

Table S1 Performances of conventional zeolite catalysts for the furfural production.

| Catalyst                      | Substrate                   | Reaction solvent | Reaction conditions | C <sub>xylose</sub> (%) | Y <sub>furfural</sub> (%) |
|-------------------------------|-----------------------------|------------------|---------------------|-------------------------|---------------------------|
| H- $\beta$ (25) <sup>1</sup>  | xylose                      | Water/Toluene    | 140 °C/4 h          | 90                      | 40                        |
| H- $\beta$ <sup>2</sup>       | Glucose and xylose mixtures | 1,4-dioxane      | 180 °C/2 h          | /                       | 63                        |
| Modified zeolite <sup>3</sup> | xylose                      | Water/GVL        | 180 °C/33 min       | /                       | 69.3                      |
| Cr-deAl-Y <sup>4</sup>        | xylose                      | Water/n-Butanol  | 180 °C/30 min       | 99.7                    | 77.5                      |
| deAl $\beta$ /Nb(20%)         | xylose/xylan                | Water/GVL        | 130 °C/3 h          | 100/100                 | 66/50                     |

## References

1. S. B. Kim, S. J. You, Y. T. Kim, S. Lee, H. Lee, K. Park and E. D. Park, *Korean Journal of Chemical Engineering*, 2011, **28**, 710-716.
2. Y. He, R. Zhang, W. Song, H. Liu, J. Zhang, W. Jia and L. Peng, *Chemical Engineering Journal*, 2024, **480**.
3. L. Zhang, G. Xi, Z. Chen, D. Jiang, H. Yu and X. Wang, *Chemical Engineering Journal*, 2017, **307**, 868-876.
4. Y. Wang, Y. Dai, T. Wang, M. Li, Y. Zhu and L. Zhang, *Fuel Processing Technology*, 2022, **237**.
